# Supplementary material
Source: PubMed Central journal article supplement (PMC1838650)
Supplement: pnas_0700258104_1.pdf [file pnas_0700258104_1.pdf]

**Table 1. Dinoflagellate species examined for presence of SL in RNA and number of the SL-containing full-length cDNA obtained**

| Species name                 | Strain    | Order         | <i>pcna</i> examined, all of which contains SL | SL-containing nuclear mRNA from random sequencing  | Nuclear-encoded plastid-targeted mRNA examined, all of which contains SL                          | Nuclear rRNA and organellar mRNA examined, none of which contains SL |
|------------------------------|-----------|---------------|------------------------------------------------|----------------------------------------------------|---------------------------------------------------------------------------------------------------|----------------------------------------------------------------------|
| <i>Akashiwo</i> sp.          | LIS1      | Gymnodiniales | 6 clones (EF133921-6)                          |                                                    |                                                                                                   |                                                                      |
| <i>Amphidinium carterae</i>  | CCMP121   | Gymnodiniales |                                                | 42 cDNAs (EF133961-4002)                           |                                                                                                   | <i>psbA</i>                                                          |
| <i>Alexandrium affine</i>    | CCMP112   | Gonyaulacales | 15 clones (EF133906-20)                        |                                                    | 4 <i>atpH</i> (EF134009-12)                                                                       |                                                                      |
| <i>A. fundyense</i>          | GT-CA28   | Gonyaulacales |                                                | 52 cDNAs (EF133854-905)                            | 1 ferredoxin (EF134003)                                                                           |                                                                      |
| <i>A. fundyense</i>          | HT-140-G4 | Gonyaulacales | 3 clones (EF133957-9)                          |                                                    |                                                                                                   |                                                                      |
| <i>A. tamarense</i>          | CB307     | Gonyaulacales |                                                |                                                    | 5 <i>atpH</i> (EF134004-8)                                                                        |                                                                      |
| <i>Heterocapsa triquetra</i> | CCMP449   | Peridinales   |                                                |                                                    | 4 <i>atpH</i> (EF134013-6)                                                                        | <i>psbA</i>                                                          |
| <i>Karlodinium micrum</i>    | CCMP1975  | Gymnodiniales | 3 clones (EF134029-31)                         | 165 cDNAs (DQ884432-51, DQ887053-70, EF134083-209) | 5 light harvesting proteins; 4 ferredoxin; 2 plastocyanin; 1 O-acetyl-serine lyase (EF134090-101) | 18S rRNA; form I <i>rbcL</i> (AF463410)                              |

| Species name                 | Strain   | Order          | <i>pcna</i> examined, all of which contains SL | SL-containing nuclear mRNA from random sequencing | Nuclear-encoded plastid-targeted mRNA examined, all of which contains SL | Nuclear rRNA and organellar mRNA examined, none of which contains SL |
|------------------------------|----------|----------------|------------------------------------------------|---------------------------------------------------|--------------------------------------------------------------------------|----------------------------------------------------------------------|
| <i>Katodinium rotundatum</i> | CCMP1542 | Peridinales    | 4 clones (EF133927-30)                         |                                                   |                                                                          |                                                                      |
| <i>Peridinium foliaceum</i>  | CCMP1326 | Peridinales    | 7 clones (EF133931-7).                         |                                                   |                                                                          |                                                                      |
| <i>Pfiesteria piscicida</i>  | CCMP1831 | Peridinales    | 18 clones (DQ239831, DQ239844-60)*             | 226 cDNAs (DQ864761-971, EF134388-402)            |                                                                          | 18S rRNA; <i>cob</i> ; <i>cox1</i>                                   |
| <i>Prorocentrum micans</i>   | CCMP1589 | Prorocentrales | 13 clones (EF133938-50)                        |                                                   |                                                                          |                                                                      |
| <i>P. minimum</i>            | CCMP696  | Prorocentrales | 12 clones (EF134017-28)                        | 35 cDNAs (DQ884413-31, EF134371-87)               | 1 form II Rubisco (DQ884420)                                             | 18S rRNA                                                             |
| <i>Symbiodinium goreauii</i> | CCMP2466 | Suessiales     | 6 clones (EF133951-6)                          |                                                   |                                                                          |                                                                      |
| <i>Noctiluca scintillans</i> | NS3      | Noctilucales   |                                                | 100 cDNAs (EF134210-308, EF141835)                |                                                                          |                                                                      |
| <i>Oxyrrhis marina</i>       | CCMP1795 | Oxyrrhinaceae  |                                                | 62 cDNAs (EF134309-70)                            |                                                                          |                                                                      |

GenBank accession nos. are in parentheses. \*, Sequences reported in Zhang H, Hou Y, Lin S (2006) *J Eukaryot Microbiol* 53:142-150.
