# Supplementary material
Source: PubMed Central journal article supplement (PMC1838650)
Supplement: pnas_0700258104_2.pdf [file pnas_0700258104_2.pdf]

**Table 2. GenBank accession number and names of genes obtained from random sequencing of SL-based cDNA libraries**

| Gene Symbol                                      | GenBank Accession No. | Encoded protein*                               |
|--------------------------------------------------|-----------------------|------------------------------------------------|
| <i>Alexandrium fundyense</i><br>(strain GT-CA28) |                       |                                                |
| Afund-5p-cDNA1                                   | EF133854              | Fructose-1,6-biphosphatase                     |
| Afund-5p-cDNA2                                   | EF133855              | Type-1 serine/threonine phosphatase            |
| Afund-5p-cDNA3                                   | EF133856              | N-acetylneuraminic acid phosphate synthase     |
| Afund-5p-cDNA4                                   | EF133857              | Glyceraldehyde-3-phosphate dehydrogenase       |
| Afund-5p-cDNA5                                   | EF133858              | Endopeptidase                                  |
| Afund-5p-cDNA6                                   | EF133859              | Endo-1,3;1,4-beta-glucanase                    |
| Afund-5p-cDNA7                                   | EF133860              | Protein disulfide-isomerase                    |
| Afund-5p-cDNA8                                   | EF133861              | Protein disulfide isomerase                    |
| Afund-5p-cDNA9                                   | EF133862              | 40S ribosomal protein S8                       |
| Afund-5p-cDNA10                                  | EF133863              | ADP-ribosylation factor                        |
| Afund-5p-cDNA11                                  | EF133864              | Ribosomal protein L35                          |
| Afund-5p-cDNA12                                  | EF133865              | ADP ribosylation factor 1                      |
| Afund-5p-cDNA13                                  | EF133866              | DNA-directed RNA polymerase                    |
| Afund-5p-cDNA14                                  | EF133867              | Dynein light chain 8-like E                    |
| Afund-5p-cDNA15                                  | EF133868              | Cyclophilin                                    |
| Afund-5p-cDNA16                                  | EF133869              | Actin                                          |
| Afund-5p-cDNA17                                  | EF133870              | Heat shock protein 90                          |
| Afund-5p-cDNA18                                  | EF133871              | Plastid oxygen-evolving enhancer 1-2 precursor |
| Afund-5p-cDNA19                                  | EF133872              | Histone-like protein                           |
| Afund-5p-cDNA20                                  | EF133873              | Calmodulin                                     |
| Afund-5p-cDNA21a                                 | EF133874              | DNA damage checkpoint protein                  |
| Afund-5p-cDNA21b                                 | EF133875              | DNA damage checkpoint protein                  |
| Afund-5p-cDNA21c                                 | EF133876              | DNA damage checkpoint protein                  |
| Afund-5p-cDNA21d                                 | EF133877              | DNA damage checkpoint protein                  |
| Afund-5p-cDNA21e                                 | EF133878              | DNA damage checkpoint protein                  |
| A_fun-ferr                                       | EF134003              | Chloroplast ferredoxin                         |
| Afund-5p-cDNA22                                  | EF133879              | Conserved hypothetical protein 1               |
| Afund-5p-cDNA23                                  | EF133880              | Conserved hypothetical protein 2               |
| Afund-5p-cDNA24                                  | EF133881              | Conserved hypothetical protein 3               |

| Gene Symbol                                     | GenBank<br>Accession<br>No. | Encoded protein*                 |
|-------------------------------------------------|-----------------------------|----------------------------------|
| Afund-5p-cDNA25                                 | EF133882                    | Conserved hypothetical protein 4 |
| Afund-5p-cDNA26                                 | EF133883                    | Conserved hypothetical protein 5 |
| Afund-5p-cDNA27a                                | EF133884                    | Unknown protein 1                |
| Afund-5p-cDNA27b                                | EF133885                    | Unknown protein 1                |
| Afund-5p-cDNA27c                                | EF133886                    | Unknown protein 1                |
| Afund-5p-cDNA27d                                | EF133887                    | Unknown protein 1                |
| Afund-5p-cDNA27e                                | EF133888                    | Unknown protein 1                |
| Afund-5p-cDNA27f                                | EF133889                    | Unknown protein 1                |
| Afund-5p-cDNA27g                                | EF133890                    | Unknown protein 1                |
| Afund-5p-cDNA28a                                | EF133891                    | Unknown protein 2                |
| Afund-5p-cDNA28b                                | EF133892                    | Unknown protein 2                |
| Afund-5p-cDNA29                                 | EF133893                    | Unknown protein 3                |
| Afund-5p-cDNA30                                 | EF133894                    | Unknown protein 4                |
| Afund-5p-cDNA31                                 | EF133895                    | Unknown protein 5                |
| Afund-5p-cDNA32                                 | EF133896                    | Unknown protein 6                |
| Afund-5p-cDNA33                                 | EF133897                    | Unknown protein 7                |
| Afund-5p-cDNA34                                 | EF133898                    | Unknown protein 8                |
| Afund-5p-cDNA35                                 | EF133899                    | Unknown protein 9                |
| Afund-5p-cDNA36                                 | EF133900                    | Unknown protein 10               |
| Afund-5p-cDNA37                                 | EF133901                    | Unknown protein 11               |
| Afund-5p-cDNA38                                 | EF133902                    | Unknown protein 12               |
| Afund-5p-cDNA39                                 | EF133903                    | Unknown protein 13               |
| Afund-5p-cDNA40                                 | EF133904                    | Unknown protein 14               |
| Afund-5p-cDNA41                                 | EF133905                    | Unknown protein 15               |
| <i>Amphidinium carterae</i><br>(strain CCMP121) |                             |                                  |
| Aca-cDNA1                                       | EF133961                    | cDNA for eIF-1A                  |
| Aca-cDNA2-1                                     | EF133962                    | Solute carrier family 35         |
| Aca-cDNA2-2                                     | EF133963                    | Solute carrier family 35         |
| Aca-cDNA3-1                                     | EF133964                    | 60S ribosomal protein L26        |
| Aca-cDNA3-2                                     | EF133965                    | 60S ribosomal protein L26        |
| Aca-cDNA3-3                                     | EF133966                    | 60S ribosomal protein L26        |
| Aca-cDNA3-4                                     | EF133967                    | 60S ribosomal protein L26        |
| Aca-cDNA4-1                                     | EF133968                    | Unknown protein 1                |

| Gene Symbol  | GenBank<br>Accession<br>No. | Encoded protein*   |
|--------------|-----------------------------|--------------------|
| Aca-cDNA4-2  | EF133969                    | Unknown protein 1  |
| Aca-cDNA4-3  | EF133970                    | Unknown protein 1  |
| Aca-cDNA5-1  | EF133971                    | Unknown protein 2  |
| Aca-cDNA5-2  | EF133972                    | Unknown protein 2  |
| Aca-cDNA5-3  | EF133973                    | Unknown protein 2  |
| Aca-cDNA5-4  | EF133974                    | Unknown protein 2  |
| Aca-cDNA5-5  | EF133975                    | Unknown protein 2  |
| Aca-cDNA6    | EF133976                    | Unknown protein 3  |
| Aca-cDNA7    | EF133977                    | Unknown protein 4  |
| Aca-cDNA8    | EF133978                    | Unknown protein 5  |
| Aca-cDNA9-1  | EF133979                    | Unknown protein 6  |
| Aca-cDNA9-2  | EF133980                    | Unknown protein 6  |
| Aca-cDNA9-3  | EF133981                    | Unknown protein 6  |
| Aca-cDNA9-4  | EF133982                    | Unknown protein 6  |
| Aca-cDNA9-5  | EF133983                    | Unknown protein 6  |
| Aca-cDNA9-6  | EF133984                    | Unknown protein 6  |
| Aca-cDNA9-7  | EF133985                    | Unknown protein 6  |
| Aca-cDNA10-1 | EF133986                    | Unknown protein 7  |
| Aca-cDNA10-2 | EF133987                    | Unknown protein 7  |
| Aca-cDNA11   | EF133988                    | Unknown protein 8  |
| Aca-cDNA12-1 | EF133989                    | Unknown protein 9  |
| Aca-cDNA12-2 | EF133990                    | Unknown protein 9  |
| Aca-cDNA13   | EF133991                    | Unknown protein 10 |
| Aca-cDNA14   | EF133992                    | Unknown protein 11 |
| Aca-cDNA15-1 | EF133993                    | Unknown protein 12 |
| Aca-cDNA15-4 | EF133994                    | Unknown protein 12 |
| Aca-cDNA15-2 | EF133995                    | Unknown protein 12 |
| Aca-cDNA15-3 | EF133996                    | Unknown protein 12 |
| Aca-cDNA16   | EF133997                    | Unknown protein 13 |
| Aca-cDNA17-1 | EF133998                    | Unknown protein 14 |
| Aca-cDNA17-2 | EF133999                    | Unknown protein 14 |
| Aca-cDNA17-3 | EF134000                    | Unknown protein 14 |
| Aca-cDNA17-4 | EF134001                    | Unknown protein 15 |
| Aca-cDNA17-5 | EF134002                    | Unknown protein 15 |

| Gene Symbol                                    | GenBank<br>Accession<br>No. | Encoded protein*                                      |
|------------------------------------------------|-----------------------------|-------------------------------------------------------|
| <i>Karlodinium micrum</i><br>(strain CCMP1975) |                             |                                                       |
| Kmi-5p-cDNA1                                   | DQ884432                    | Chlorophyll a-b binding protein                       |
| Kmi-5p-cDNA2                                   | DQ884433                    | Heat shock protein 90                                 |
| Kmi-5p-cDNA3                                   | DQ884434                    | 40S ribosomal protein S6                              |
| Kmi-5p-cDNA4                                   | DQ884435                    | Camp-dependent protein kinase                         |
| Kmi-5p-cDNA5                                   | DQ884436                    | Cyclophilin                                           |
| Kmi-5p-cDNA6                                   | DQ884437                    | Isomerase                                             |
| Kmi-5p-cDNA7                                   | DQ884438                    | Isomerase                                             |
| Kmi-5p-cDNA8                                   | DQ884439                    | Isomerase                                             |
| Kmi-5p-cDNA9                                   | DQ884440                    | Major basic nucleic protein                           |
| Kmi-5p-cDNA10                                  | DQ884441                    | Major basic nucleic protein                           |
| Kmi-5p-cDNA11                                  | DQ884442                    | Major basic nucleic protein                           |
| Kmi-5p-cDNA12                                  | DQ884443                    | Major basic nucleic protein                           |
| Kmi-5p-cDNA13                                  | DQ884444                    | Major basic nucleic protein                           |
| Kmi-5p-cDNA14                                  | DQ884445                    | Major basic nucleic protein                           |
| Kmi-5p-cDNA15                                  | DQ884446                    | Major basic nucleic protein                           |
| Kmi-5p-cDNA16                                  | DQ884447                    | Major basic nucleic protein                           |
| Kmi-5p-cDNA17                                  | DQ884448                    | Calmodulin-like                                       |
| Kmi-5p-cDNA18                                  | DQ884449                    | Calmodulin                                            |
| Kmi-5p-cDNA19                                  | DQ884450                    | Calmodulin                                            |
| Kmi-5p-cDNA20                                  | DQ884451                    | Calmodulin                                            |
| Kmi-5p-cDNA21                                  | DQ867053                    | Chloroplast plastocyanin                              |
| Kmi-5p-cDNA22                                  | DQ867054                    | Weak similarity to nuclear calmodulin-binding protein |
| Kmi-5p-cDNA23                                  | DQ867055                    | Enoyl-coa hydratase/carnithine racemase               |
| Kmi-5p-cDNA24                                  | DQ867056                    | Actin                                                 |
| Kmi-5p-cDNA25                                  | DQ867057                    | ATP synthase F0, subunit C                            |
| Kmi-5p-cDNA26                                  | DQ867058                    | Plastocyanin                                          |
| Kmi-5p-cDNA27                                  | DQ867059                    | Chloroplast light harvesting protein isoform 4        |
| Kmi-5p-cDNA28                                  | DQ867060                    | Conserved Hypothetical protein                        |
| Kmi-5p-cDNA29                                  | DQ867061                    | Glyceraldehydes-3-phosphate dehydrogenase             |
| Kmi-5p-cDNA30                                  | DQ867062                    | Small nuclear riboprotein Sm-D1                       |
| Kmi-5p-cDNA31                                  | DQ867063                    | Unknown protein1                                      |
| Kmi-5p-cDNA32                                  | DQ867064                    | Unknown protein2                                      |

| Gene Symbol   | GenBank<br>Accession<br>No. | Encoded protein*                                                        |
|---------------|-----------------------------|-------------------------------------------------------------------------|
| Kmi-5p-cDNA33 | DQ867065                    | Unknown protein3                                                        |
| Kmi-5p-cDNA34 | DQ867066                    | Unknown protein4                                                        |
| Kmi-5p-cDNA35 | DQ867067                    | Unknown protein5                                                        |
| Kmi-5p-cDNA36 | DQ867068                    | Unknown protein6                                                        |
| Kmi-5p-cDNA37 | DQ867069                    | Unknown protein7                                                        |
| Kmi-5p-cDNA38 | DQ867070                    | Unknown protein8                                                        |
| Kmi-cDNAN1-1  | EF134083                    | Actin                                                                   |
| Kmi-cDNAN1-2  | EF134084                    | Actin                                                                   |
| Kmi-cDNAN2    | EF134085                    | Tubulin alpha chain                                                     |
| Kmi-cDNAN3    | EF134086                    | Beta-tubulin                                                            |
| Kmi-cDNAN4    | EF134087                    | Profilin                                                                |
| Kmi-cDNAN5-1  | EF134088                    | Skp1 family protein                                                     |
| Kmi-cDNAN5-2  | EF134089                    | Skp1 family protein                                                     |
| Kmi-cDNAN6-1  | EF134090                    | Light harvesting protein isoform 4; nuclear gene for chloroplast        |
| Kmi-cDNAN6-2  | EF134091                    | Light harvesting protein isoform 4; nuclear gene for chloroplast        |
| Kmi-cDNAN7    | EF134092                    | Light harvesting protein isoform 5-like; nuclear gene for chloroplast   |
| Kmi-cDNAN8    | EF134093                    | Light harvesting protein isoform 6; nuclear gene for chloroplast        |
| Kmi-cDNAN9    | EF134094                    | Light harvesting protein isoform 12; nuclear gene for chloroplast       |
| Kmi-cDNAN10-1 | EF134095                    | Chloroplast ferredoxin, nuclear gene for chloroplast product            |
| Kmi-cDNAN10-2 | EF134096                    | Chloroplast ferredoxin, nuclear gene for chloroplast product            |
| Kmi-cDNAN10-3 | EF134097                    | Chloroplast ferredoxin, nuclear gene for chloroplast product            |
| Kmi-cDNAN10-4 | EF134098                    | Chloroplast ferredoxin, nuclear gene for chloroplast product            |
| Kmi-cDNAN11-1 | EF134099                    | Chloroplast plastocyanin, nuclear gene for chloroplast product          |
| Kmi-cDNAN11-2 | EF134100                    | Chloroplast plastocyanin, nuclear gene for chloroplast product          |
| Kmi-cDNAN12   | EF134101                    | Chloroplast O-acetyl-serine lyase, nuclear gene for chloroplast product |
| Kmi-cDNAN13-1 | EF134102                    | Major basic nuclear protein                                             |
| Kmi-cDNAN13-2 | EF134103                    | Major basic nuclear protein                                             |
| Kmi-cDNAN13-3 | EF134104                    | Major basic nuclear protein                                             |

| Gene Symbol   | GenBank<br>Accession<br>No. | Encoded protein*                                      |
|---------------|-----------------------------|-------------------------------------------------------|
| Kmi-cDNAN13-4 | EF134105                    | Major basic nuclear protein                           |
| Kmi-cDNAN13-5 | EF134106                    | Major basic nuclear protein                           |
| Kmi-cDNAN13-6 | EF134107                    | Major basic nuclear protein                           |
| Kmi-cDNAN14   | EF134108                    | HMG-box-like protein                                  |
| Kmi-cDNAN15   | EF134109                    | Small nuclear ribonucleoprotein Sm D1                 |
| Kmi-cDNAN16   | EF134110                    | RNA-binding protein (RRM domain)                      |
| Kmi-cDNAN17   | EF134111                    | RNA recognition motif (RRM) protein                   |
| Kmi-cDNAN18-1 | EF134112                    | Cold shock protein-like                               |
| Kmi-cDNAN18-2 | EF134113                    | Cold shock protein-like                               |
| Kmi-cDNAN19   | EF134114                    | Hydrogen-transporting ATP synthase                    |
| Kmi-cDNAN20-1 | EF134115                    | ATP/ADP translocator                                  |
| Kmi-cDNAN20-2 | EF134116                    | ATP/ADP translocator                                  |
| Kmi-cDNAN21   | EF134117                    | Karodinium micrum CCMP1975, atpase subunit 9-like     |
| Kmi-cDNAN22   | EF134118                    | ADP-ribosylation factor                               |
| Kmi-cDNAN23   | EF134119                    | Adenylate kinase                                      |
| Kmi-cDNAN24   | EF134120                    | Short chain dehydrogenase                             |
| Kmi-cDNAN25   | EF134121                    | Hydrolase                                             |
| Kmi-cDNAN26-1 | EF134122                    | Triose-phosphate isomerase                            |
| Kmi-cDNAN26-2 | EF134123                    | Triose-phosphate isomerase                            |
| Kmi-cDNAN27   | EF134124                    | Thioredoxin-like                                      |
| Kmi-cDNAN28   | EF134125                    | Tim10/DDP family zinc finger                          |
| Kmi-cDNAN29   | EF134126                    | Nonclathrin coat protein-like                         |
| Kmi-cDNAN30   | EF134127                    | Lipocalin-like (lipoprotein)                          |
| Kmi-cDNAN31   | EF134128                    | Serine/threonine kinase                               |
| Kmi-cDNAN32   | EF134129                    | Serine/threonine kinase-like                          |
| Kmi-cDNAN33   | EF134130                    | 14-3-3-like protein                                   |
| Kmi-cDNAN34-1 | EF134131                    | Caltractin (centrin)                                  |
| Kmi-cDNAN34-2 | EF134132                    | Caltractin                                            |
| Kmi-cDNAN35   | EF134133                    | 60S acidic ribosomal protein P2                       |
| Kmi-cDNAN36   | EF134134                    | 40S ribosomal protein S10                             |
| Kmi-cDNAN37   | EF134135                    | Translation elongation factor-like                    |
| Kmi-cDNAN38   | EF134136                    | Metallo cofactor biosynthesis protein                 |
| Kmi-cDNAN39   | EF134137                    | Peptidyl-prolyl cis-trans isomerase, cyclophilin type |
| Kmi-cDNAN40   | EF134138                    | Peptidyl-prolyl cis-trans isomerase, cyclophilin-type |

| Gene Symbol   | GenBank<br>Accession<br>No. | Encoded protein*                                                      |
|---------------|-----------------------------|-----------------------------------------------------------------------|
| Kmi-cDNAN41   | EF134139                    | Protein disulfide-isomerase-like protein ehsep2 precursor             |
| Kmi-cDNAN42   | EF134140                    | Tropinone reductase-like                                              |
| Kmi-cDNAN43   | EF134141                    | Methyltransferase-like                                                |
| Kmi-cDNAN44   | EF134142                    | Ankyrin-like protein                                                  |
| Kmi-cDNAN45   | EF134143                    | ANK-like                                                              |
| Kmi-cDNAN46   | EF134144                    | LRR_RI, Leucine-rich repeats (lrrs), ribonuclease inhibitor (RI)-like |
| Kmi-cDNAN47   | EF134145                    | Aspartic proteinase                                                   |
| Kmi-cDNAN48   | EF134146                    | Polyubiquitin (six repeats)                                           |
| Kmi-cDNAN49-1 | EF134147                    | Conserved hypothetical protein 1                                      |
| Kmi-cDNAN49-2 | EF134148                    | Conserved hypothetical protein 1                                      |
| Kmi-cDNAN50   | EF134149                    | Conserved hypothetical protein 2                                      |
| Kmi-cDNAN51   | EF134150                    | Conserved hypothetical protein 3                                      |
| Kmi-cDNAN52   | EF134151                    | Conserved hypothetical protein 4                                      |
| Kmi-cDNAN53   | EF134152                    | Conserved hypothetical protein 5                                      |
| Kmi-cDNAN54   | EF134153                    | Conserved hypothetical protein 6                                      |
| Kmi-cDNAN55-1 | EF134154                    | Conserved hypothetical protein 7                                      |
| Kmi-cDNAN55-2 | EF134155                    | Conserved hypothetical protein 8                                      |
| Kmi-cDNAN56   | EF134156                    | Unknown protein 9                                                     |
| Kmi-cDNAN57   | EF134157                    | Unknown protein 10                                                    |
| Kmi-cDNAN58   | EF134158                    | Unknown protein 11                                                    |
| Kmi-cDNAN59   | EF134159                    | Unknown protein 12                                                    |
| Kmi-cDNAN60   | EF134160                    | Unknown protein 13                                                    |
| Kmi-cDNAN61   | EF134161                    | Unknown protein 14                                                    |
| Kmi-cDNAN62-1 | EF134162                    | Unknown protein 15                                                    |
| Kmi-cDNAN62-2 | EF134163                    | Unknown protein 15                                                    |
| Kmi-cDNAN63   | EF134164                    | Unknown protein 16                                                    |
| Kmi-cDNAN64   | EF134165                    | Unknown protein 17                                                    |
| Kmi-cDNAN65   | EF134166                    | Unknown protein 18                                                    |
| Kmi-cDNAN66   | EF134167                    | Unknown protein 19                                                    |
| Kmi-cDNAN67-1 | EF134168                    | Unknown protein 20                                                    |
| Kmi-cDNAN67-2 | EF134169                    | Unknown protein 20                                                    |
| Kmi-cDNAN68   | EF134170                    | Unknown protein 21                                                    |
| Kmi-cDNAN69   | EF134171                    | Unknown protein 22                                                    |

| Gene Symbol   | GenBank<br>Accession<br>No. | Encoded protein*   |
|---------------|-----------------------------|--------------------|
| Kmi-cDNAN70   | EF134172                    | Unknown protein 23 |
| Kmi-cDNAN71   | EF134173                    | Unknown protein 24 |
| Kmi-cDNAN72   | EF134174                    | Unknown protein 25 |
| Kmi-cDNAN73   | EF134175                    | Unknown protein 26 |
| Kmi-cDNAN74   | EF134176                    | Unknown protein 27 |
| Kmi-cDNAN75   | EF134177                    | Unknown protein 28 |
| Kmi-cDNAN76-1 | EF134178                    | Unknown protein 29 |
| Kmi-cDNAN76-2 | EF134179                    | Unknown protein 29 |
| Kmi-cDNAN77   | EF134180                    | Unknown protein 30 |
| Kmi-cDNAN78   | EF134181                    | Unknown protein 31 |
| Kmi-cDNAN79   | EF134182                    | Unknown protein 32 |
| Kmi-cDNAN80   | EF134183                    | Unknown protein 33 |
| Kmi-cDNAN81   | EF134184                    | Unknown protein 34 |
| Kmi-cDNAN82   | EF134185                    | Unknown protein 35 |
| Kmi-cDNAN83   | EF134186                    | Unknown protein 36 |
| Kmi-cDNAN84   | EF134187                    | Unknown protein 37 |
| Kmi-cDNAN85-1 | EF134188                    | Unknown protein 38 |
| Kmi-cDNAN85-2 | EF134189                    | Unknown protein 38 |
| Kmi-cDNAN86   | EF134190                    | Unknown protein 39 |
| Kmi-cDNAN87   | EF134191                    | Unknown protein 40 |
| Kmi-cDNAN88   | EF134192                    | Unknown protein 41 |
| Kmi-cDNAN89   | EF134193                    | Unknown protein 42 |
| Kmi-cDNAN90   | EF134194                    | Unknown protein 43 |
| Kmi-cDNAN91   | EF134195                    | Unknown protein 44 |
| Kmi-cDNAN92   | EF134196                    | Unknown protein 45 |
| Kmi-cDNAN93   | EF134197                    | Unknown protein 46 |
| Kmi-cDNAN94   | EF134198                    | Unknown protein 47 |
| Kmi-cDNAN95   | EF134199                    | Unknown protein 48 |
| Kmi-cDNAN96   | EF134200                    | Unknown protein 49 |
| Kmi-cDNAN97   | EF134201                    | Unknown protein 50 |
| Kmi-cDNAN98   | EF134202                    | Unknown protein 51 |
| Kmi-cDNAN99   | EF134203                    | Unknown protein 52 |
| Kmi-cDNAN100  | EF134204                    | Unknown protein 53 |
| Kmi-cDNAN101  | EF134205                    | Unknown protein 54 |



| Gene Symbol                               | GenBank<br>Accession<br>No. | Encoded protein*                               |
|-------------------------------------------|-----------------------------|------------------------------------------------|
| Kmi-cDNAN102                              | EF134206                    | Unknown protein 55                             |
| Kmi-cDNAN103                              | EF134207                    | Unknown protein 56                             |
| Kmi-cDNAN104                              | EF134208                    | Unknown protein 57                             |
| Kmi-cDNAN105                              | EF134209                    | Unknown protein 58                             |
| <i>Noctiluca scintillans</i> (strain NS3) |                             |                                                |
| Nsc-cDNA1                                 | EF134210                    | Membrane transporter protein                   |
| Nsc-cDNA2                                 | EF134211                    | Mitochondrial phosphate carrier protein (Mir1) |
| Nsc-cDNA3-1                               | EF134212                    | Ubiquitin-conjugating enzyme E2-like           |
| Nsc-cDNA3-2                               | EF134213                    | Ubiquitin-conjugating enzyme E2-like           |
| Nsc-cDNA3-3                               | EF134214                    | Ubiquitin-conjugating enzyme E2-like           |
| Nsc-cDNA3-4                               | EF134215                    | Ubiquitin-conjugating enzyme E2-like           |
| Nsc-cDNA4-1                               | EF134216                    | Ubiquitin (15 unit)                            |
| Nsc-cDNA4-2                               | EF134217                    | Ubiquitin (4 units)                            |
| Nsc-cDNA5-1                               | EF134218                    | Cysteine protease 1                            |
| Nsc-cDNA5-2                               | EF134219                    | Cysteine protease 1                            |
| Nsc-cDNA6                                 | EF134220                    | Thioredoxin                                    |
| Nsc-cDNA7                                 | EF134221                    | Cysteine synthase                              |
| Nsc-cDNA8                                 | EF134222                    | Calmodulin                                     |
| Nsc-cDNA9                                 | EF134223                    | Translation initiation factor 5A               |
| Nsc-cDNA10                                | EF134224                    | Synaptobrevin like                             |
| Nsc-cDNA11                                | EF134225                    | Actin                                          |
| Nsc-cDNA12                                | EF134226                    | Myophilin-like protein (two units)             |
| Nsc-cDNA13-1                              | EF134227                    | Profilin-like protein                          |
| Nsc-cDNA13-2                              | EF134228                    | Profilin-like protein                          |
| Nsc-cDNA13-3                              | EF134229                    | Profilin-like protein                          |
| Nsc-cDNA13-4                              | EF134230                    | Profilin-like protein                          |
| Nsc-cDNA14                                | EF134231                    | Histone-like DNA-binding protein               |
| Nsc-cDNA15                                | EF134232                    | RNA-binding protein                            |
| Nsc-cDNA16                                | EF134233                    | Heat shock protein DNAJ homologue pfj4         |
| Nsc-cDNA17                                | EF134234                    | Molecular chaperone (dnaj-like)                |
| Nsc-cDNA18                                | EF134235                    | Manganese superoxide dismutase-like            |
| Nsc-cDNA19                                | EF134236                    | Hydrolases-like                                |
| Nsc-cDNA20-1                              | EF134237                    | Conserved hypothetical protein 1               |

| Gene Symbol  | GenBank<br>Accession<br>No. | Encoded protein*                 |
|--------------|-----------------------------|----------------------------------|
| Nsc-cDNA20-2 | EF134238                    | Conserved hypothetical protein 1 |
| Nsc-cDNA21   | EF134239                    | Conserved hypothetical protein 2 |
| Nsc-cDNA22   | EF134240                    | Conserved hypothetical protein 3 |
| Nsc-cDNA23   | EF134241                    | Conserved hypothetical protein 4 |
| Nsc-cDNA24   | EF134242                    | Conserved hypothetical protein 5 |
| Nsc-cDNA25-1 | EF134243                    | Unknown protein 1                |
| Nsc-cDNA25-2 | EF134244                    | Unknown protein 1                |
| Nsc-cDNA25-3 | EF134245                    | Unknown protein 1                |
| Nsc-cDNA25-4 | EF134246                    | Unknown protein 1                |
| Nsc-cDNA26-1 | EF134247                    | Unknown protein 2                |
| Nsc-cDNA26-2 | EF134248                    | Unknown protein 2                |
| Nsc-cDNA26-3 | EF134249                    | Unknown protein 2                |
| Nsc-cDNA27-1 | EF134250                    | Unknown protein 3                |
| Nsc-cDNA27-2 | EF141835                    | Unknown protein 3                |
| Nsc-cDNA27-3 | EF134251                    | Unknown protein 3                |
| Nsc-cDNA28-1 | EF134252                    | Unknown protein 4                |
| Nsc-cDNA28-2 | EF134253                    | Unknown protein 4                |
| Nsc-cDNA28-3 | EF134254                    | Unknown protein 5                |
| Nsc-cDNA29-1 | EF134255                    | Unknown protein 6                |
| Nsc-cDNA29-2 | EF134256                    | Unknown protein 6                |
| Nsc-cDNA29-3 | EF134257                    | Unknown protein 6                |
| Nsc-cDNA29-4 | EF134258                    | Unknown protein 6                |
| Nsc-cDNA30-1 | EF134259                    | Unknown protein 7                |
| Nsc-cDNA30-2 | EF134260                    | Unknown protein 7                |
| Nsc-cDNA31   | EF134261                    | Unknown protein 8                |
| Nsc-cDNA32   | EF134262                    | Unknown protein 9                |
| Nsc-cDNA33-1 | EF134263                    | Unknown protein 10               |
| Nsc-cDNA33-2 | EF134264                    | Unknown protein 10               |
| Nsc-cDNA33-3 | EF134265                    | Unknown protein 10               |
| Nsc-cDNA34   | EF134266                    | Unknown protein 11               |
| Nsc-cDNA35-1 | EF134267                    | Unknown protein 12               |
| Nsc-cDNA35-2 | EF134268                    | Unknown protein 12               |
| Nsc-cDNA35-3 | EF134269                    | Unknown protein 12               |
| Nsc-cDNA35-4 | EF134270                    | Unknown protein 12               |

| Gene Symbol  | GenBank<br>Accession<br>No. | Encoded protein*   |
|--------------|-----------------------------|--------------------|
| Nsc-cDNA36-1 | EF134271                    | Unknown protein 13 |
| Nsc-cDNA36-2 | EF134272                    | Unknown protein 13 |
| Nsc-cDNA37   | EF134273                    | Unknown protein 14 |
| Nsc-cDNA38-1 | EF134274                    | Unknown protein 15 |
| Nsc-cDNA38-2 | EF134275                    | Unknown protein 15 |
| Nsc-cDNA38-3 | EF134276                    | Unknown protein 15 |
| Nsc-cDNA39-1 | EF134277                    | Unknown protein 16 |
| Nsc-cDNA39-2 | EF134278                    | Unknown protein 16 |
| Nsc-cDNA39-3 | EF134279                    | Unknown protein 16 |
| Nsc-cDNA40-1 | EF134280                    | Unknown protein 17 |
| Nsc-cDNA40-2 | EF134281                    | Unknown protein 17 |
| Nsc-cDNA40-3 | EF134282                    | Unknown protein 17 |
| Nsc-cDNA41   | EF134283                    | Unknown protein 18 |
| Nsc-cDNA42   | EF134284                    | Unknown protein 19 |
| Nsc-cDNA43   | EF134285                    | Unknown protein 20 |
| Nsc-cDNA44-1 | EF134286                    | Unknown protein 21 |
| Nsc-cDNA44-2 | EF134287                    | Unknown protein 21 |
| Nsc-cDNA44-3 | EF134288                    | Unknown protein 21 |
| Nsc-cDNA44-4 | EF134289                    | Unknown protein 21 |
| Nsc-cDNA45   | EF134290                    | Unknown protein 22 |
| Nsc-cDNA46   | EF134291                    | Unknown protein 23 |
| Nsc-cDNA47   | EF134292                    | Unknown protein 24 |
| Nsc-cDNA48-1 | EF134293                    | Unknown protein 25 |
| Nsc-cDNA48-2 | EF134294                    | Unknown protein 25 |
| Nsc-cDNA49   | EF134295                    | Unknown protein 26 |
| Nsc-cDNA50   | EF134296                    | Unknown protein 27 |
| Nsc-cDNA51   | EF134297                    | Unknown protein 28 |
| Nsc-cDNA52   | EF134298                    | Unknown protein 29 |
| Nsc-cDNA53-1 | EF134299                    | Unknown protein 30 |
| Nsc-cDNA53-2 | EF134300                    | Unknown protein 30 |
| Nsc-cDNA54   | EF134301                    | Unknown protein 31 |
| Nsc-cDNA55   | EF134302                    | Unknown protein 32 |
| Nsc-cDNA56   | EF134303                    | Unknown protein 33 |
| Nsc-cDNA57   | EF134304                    | Unknown protein 34 |

| Gene Symbol                                 | GenBank<br>Accession<br>No. | Encoded protein*                       |
|---------------------------------------------|-----------------------------|----------------------------------------|
| Nsc-cDNA58                                  | EF134305                    | Unknown protein 35                     |
| Nsc-cDNA59                                  | EF134306                    | Unknown protein 36                     |
| Nsc-cDNA60                                  | EF134307                    | Unknown protein 37                     |
| Nsc-cDNA61                                  | EF134308                    | Unknown protein 38                     |
| <i>Oxyrrhis marina</i> (strain<br>CCMP1795) |                             |                                        |
| Om-5p-1                                     | EF134309                    | Rudimentary enhancer                   |
| Om-5p-2-1                                   | EF134310                    | eIF5a                                  |
| Om-5p-2-2                                   | EF134311                    | eIF6a                                  |
| Om-5p-3-1                                   | EF134312                    | Rhodopsin                              |
| Om-5p-3-2                                   | EF134313                    | Rhodopsin                              |
| Om-5p-3-3                                   | EF134314                    | Rhodopsin                              |
| Om-5p-3-4                                   | EF134315                    | Rhodopsin                              |
| Om-5p-3-5                                   | EF134316                    | Rhodopsin                              |
| Om-5p-3-6                                   | EF134317                    | Rhodopsin                              |
| Om-5p-3-7                                   | EF134318                    | Rhodopsin                              |
| Om-5p-4                                     | EF134319                    | Glutaredoxin-related protein           |
| Om-5p-5-1                                   | EF134320                    | ADP-ribosylation factor 1              |
| Om-5p-5-2                                   | EF134321                    | ADP-ribosylation factor-like protein 3 |
| Om-5p-6                                     | EF134322                    | Cysteine proteinase                    |
| Om-5p-7-1                                   | EF134323                    | 60S ribosomal protein L31              |
| Om-5p-7-2                                   | EF134324                    | 60S ribosomal protein L31              |
| Om-5p-8                                     | EF134325                    | 60S ribosomal protein L26              |
| Om-5p-9-1                                   | EF134326                    | 40S ribosomal protein S16              |
| Om-5p-9-2                                   | EF134327                    | 40S ribosomal protein S16              |
| Om-5p-10                                    | EF134328                    | 40S ribosomal protein S28              |
| Om-5p-11                                    | EF134329                    | 40S ribosomal protein S19              |
| Om-5p-12                                    | EF134330                    | Ribosomal protein L38                  |
| Om-5p-13                                    | EF134331                    | Ribosomal protein l36e                 |
| Om-5p-14-1                                  | EF134332                    | Ribosomal protein L27a                 |
| Om-5p-14-2                                  | EF134333                    | Ribosomal protein l27a                 |
| Om-5p-15-1                                  | EF134334                    | 60S ribosomal protein L21              |
| Om-5p-15-2                                  | EF134335                    | Ribosomal protein L21                  |
| Om-5p-15-3                                  | EF134336                    | Ribosomal protein L21                  |

| Gene Symbol | GenBank<br>Accession<br>No. | Encoded protein*                                         |
|-------------|-----------------------------|----------------------------------------------------------|
| Om-5p-16    | EF134337                    | 7883 ribosomal protein L39                               |
| Om-5p-17    | EF134338                    | 60S ribosomal proteins L8/L2 + 40S ribosomal protein S15 |
| Om-5p-18    | EF134339                    | 40S ribosomal protein S15                                |
| Om-5p-19    | EF134340                    | Ribosomal protein L23                                    |
| Om-5p-20    | EF134341                    | Ribosomal protein L37A                                   |
| Om-5p-21-1  | EF134342                    | Ribosomal protein L30                                    |
| Om-5p-21-2  | EF134343                    | Ribosomal protein L30                                    |
| Om-5p-23-1  | EF134344                    | Ribosomal protein s23e                                   |
| Om-5p-23-2  | EF134345                    | Ribosomal protein s23e                                   |
| Om-5p-23-3  | EF134346                    | Ribosomal protein s23e                                   |
| Om-5p-23-4  | EF134347                    | Ribosomal protein s23e                                   |
| Om-5p-23-5  | EF134348                    | Ribosomal protein s23e                                   |
| Om-5p-24    | EF134349                    | 40S ribosomal protein S17                                |
| Om-5p-25    | EF134350                    | 40S ribosomal protein S14                                |
| Om-5p-26    | EF134351                    | Ribosomal protein l28e                                   |
| Om-5p-27    | EF134352                    | Ribosomal protein S30                                    |
| Om-5p-28    | EF134353                    | 40S ribosomal protein S5                                 |
| Om-5p-29    | EF134354                    | Ribosomal protein S20                                    |
| Om-5p-30    | EF134355                    | 40S ribosomal protein S13                                |
| Om-5p-31    | EF134356                    | 40S ribosomal protein S26                                |
| Om-5p-32    | EF134357                    | Ribosomal protein, L17                                   |
| Om-5p-33    | EF134358                    | 40S ribosomal protein S21                                |
| Om-5p-34    | EF134359                    | Ribosomal protein L35                                    |
| Om-5p-35    | EF134360                    | Similar to mouse meiosis expressed gene 1                |
| Om-5p-36    | EF134361                    | Conserved hypothetical protein                           |
| Om-5p-37    | EF134362                    | Unknown protein 1                                        |
| Om-5p-38    | EF134363                    | Unknown protein 2                                        |
| Om-5p-39    | EF134364                    | Unknown protein 3                                        |
| Om-5p-40    | EF134365                    | Unknown protein 4                                        |
| Om-5p-41    | EF134366                    | Unknown protein 5                                        |
| Om-5p-42    | EF134367                    | Unknown protein 6                                        |
| Om-5p-43    | EF134368                    | Unknown protein 7                                        |
| Om-5p-44    | EF134369                    | Unknown protein 8                                        |
| Om-5p-45    | EF134370                    | Unknown protein 9                                        |

| Gene Symbol                                   | GenBank<br>Accession<br>No. | Encoded protein*                              |
|-----------------------------------------------|-----------------------------|-----------------------------------------------|
| <i>Pfiesteria piscicida</i> (strain CCMP1831) |                             |                                               |
| ppi-5p-ppi-1                                  | DQ864761                    | BTB, Broad-Complex, Tramtrack and Bric a brac |
| ppi-5p-2-1                                    | DQ864762                    | Cytochrome c                                  |
| ppi-5p-2-2                                    | DQ864763                    | Cytochrome c                                  |
| ppi-5p-2-3                                    | DQ864764                    | Cytochrome c                                  |
| ppi-5p-2-4                                    | DQ864765                    | Cytochrome c                                  |
| ppi-5p-2-5                                    | DQ864766                    | Cytochrome c                                  |
| ppi-5p-2-6                                    | DQ864767                    | Cytochrome c                                  |
| ppi-5p-2-7                                    | DQ864768                    | Cytochrome c                                  |
| ppi-5p-2-8                                    | DQ864769                    | Cytochrome c                                  |
| ppi-5p-3-1                                    | DQ864770                    | ADP-ribosylation factor                       |
| ppi-5p-3-2                                    | DQ864771                    | ADP-ribosylation factor                       |
| ppi-5p-3-3                                    | DQ864772                    | ADP-ribosylation factor                       |
| ppi-5p-3-4                                    | DQ864773                    | ADP-ribosylation factor                       |
| ppi-5p-3-5                                    | DQ864774                    | ADP-ribosylation factor                       |
| ppi-5p-3-6                                    | DQ864775                    | ADP-ribosylation factor                       |
| ppi-5p-3-7                                    | DQ864776                    | ADP-ribosylation factor                       |
| ppi-5p-3-8                                    | DQ864777                    | ADP-ribosylation factor                       |
| ppi-5p-3-9                                    | DQ864778                    | ADP-ribosylation factor                       |
| ppi-5p-3-10                                   | DQ864779                    | ADP-ribosylation factor                       |
| ppi-5p-3-11                                   | DQ864780                    | ADP-ribosylation factor                       |
| ppi-5p-3-12                                   | DQ864781                    | ADP-ribosylation factor                       |
| ppi-5p-3-13                                   | DQ864782                    | ADP-ribosylation factor                       |
| ppi-5p-3-14                                   | DQ864783                    | ADP-ribosylation factor                       |
| ppi-5p-3-15                                   | DQ864784                    | ADP-ribosylation factor                       |
| ppi-5p-3-16                                   | DQ864785                    | ADP-ribosylation factor                       |
| ppi-5p-3-17                                   | DQ864786                    | ADP-ribosylation factor                       |
| ppi-5p-4-1                                    | DQ864787                    | Vesicle transport v-SNARE protein             |
| ppi-5p-4-2                                    | DQ864788                    | Vesicle transport v-SNARE protein             |
| ppi-5p-5                                      | DQ864789                    | Weak similarity to ubiq                       |
| ppi-5p-6-1                                    | DQ864790                    | Some similarity to SAM, Sterile alpha motif   |
| ppi-5p-6-2                                    | DQ864791                    | Some similarity to SAM, Sterile alpha motif   |
| ppi-5p-7                                      | DQ864792                    | Ubiquinol-cytochrome C chaperone              |

| Gene Symbol  | GenBank<br>Accession<br>No. | Encoded protein*              |
|--------------|-----------------------------|-------------------------------|
| ppi-5p-8     | DQ864793                    | MAPEG family                  |
| ppi-5p-9-1   | DQ864794                    | Mitochondrial carrier protein |
| ppi-5p-9-2   | DQ864795                    | Mitochondrial carrier protein |
| ppi-5p-10-1  | DQ864796                    | RING-finger                   |
| ppi-5p-10-2  | DQ864797                    | RING-finger                   |
| ppi-5p-11-1  | DQ864798                    | Major basic nuclear protein   |
| ppi-5p-11-2  | DQ864799                    | Major basic nuclear protein   |
| ppi-5p-11-3  | DQ864800                    | Major basic nuclear protein   |
| ppi-5p-11-4  | DQ864801                    | Major basic nuclear protein   |
| ppi-5p-11-5  | DQ864802                    | Major basic nuclear protein   |
| ppi-5p-11-6  | DQ864803                    | Major basic nuclear protein   |
| ppi-5p-11-7  | DQ864804                    | Major basic nuclear protein   |
| ppi-5p-11-8  | DQ864805                    | Major basic nuclear protein   |
| ppi-5p-11-9  | DQ864806                    | Major basic nuclear protein   |
| ppi-5p-11-10 | DQ864807                    | Major basic nuclear protein   |
| ppi-5p-11-11 | DQ864808                    | Major basic nuclear protein   |
| ppi-5p-11-12 | DQ864809                    | Major basic nuclear protein   |
| ppi-5p-11-13 | DQ864810                    | Major basic nuclear protein   |
| ppi-5p-11-14 | DQ864811                    | Major basic nuclear protein   |
| ppi-5p-11-15 | DQ864812                    | Major basic nuclear protein   |
| ppi-5p-11-16 | DQ864813                    | Major basic nuclear protein   |
| ppi-5p-11-17 | DQ864814                    | Major basic nuclear protein   |
| ppi-5p-11-18 | DQ864815                    | Major basic nuclear protein   |
| ppi-5p-11-19 | DQ864816                    | Major basic nuclear protein   |
| ppi-5p-11-20 | DQ864817                    | Major basic nuclear protein   |
| ppi-5p-11-21 | DQ864818                    | Major basic nuclear protein   |
| ppi-5p-11-22 | DQ864819                    | Major basic nuclear protein   |
| ppi-5p-12-1  | DQ864820                    | SCP-2 sterol transfer family  |
| ppi-5p-12-2  | DQ864821                    | SCP-2 sterol transfer family  |
| ppi-5p-13-1  | DQ864822                    | Calmodulin                    |
| ppi-5p-13-2  | DQ864823                    | Calmodulin                    |
| ppi-5p-13-3  | DQ864824                    | Calmodulin                    |
| ppi-5p-13-4  | DQ864825                    | Calmodulin                    |
| ppi-5p-13-5  | DQ864826                    | Calmodulin                    |

| Gene Symbol    | GenBank<br>Accession<br>No. | Encoded protein*                                                       |
|----------------|-----------------------------|------------------------------------------------------------------------|
| ppi-5p-13-5(2) | EF134388                    | Calmodulin                                                             |
| ppi-5p-14      | DQ864827                    | 60S ribosomal protein I21                                              |
| ppi-5p-15      | DQ864828                    | 60S ribosomal protein L32                                              |
| ppi-5p-16      | DQ864829                    | Ribosomal protein, 40S subunit S21                                     |
| ppi-5p-17      | DQ864830                    | 40S ribosomal protein S24                                              |
| ppi-5p-17-2    | EF134389                    | 40S ribosomal subunit protein S24                                      |
| ppi-5p-18      | DQ864831                    | Ribosomal protein L44                                                  |
| ppi-5p-19-1    | DQ864832                    | The eukaryotic smd2-like proteins                                      |
| ppi-5p-19-2    | DQ864833                    | The eukaryotic smd2-like proteins                                      |
| ppi-5p-20      | DQ864834                    | Gpma, Phosphoglycerate mutase 1                                        |
| ppi-5p-21      | DQ864835                    | The eukaryotic smg-like proteins                                       |
| ppi-5p-22      | DQ864836                    | B-Box C-terminal domain                                                |
| ppi-5p-23-1    | DQ864837                    | Ubiquinol-cytochrome C reductase hinge protein                         |
| ppi-5p-23-2    | DQ864838                    | Ubiquinol-cytochrome C reductase hinge protein                         |
| ppi-5p-23-3    | EF134390                    | Ubiquinol-cytochrome c reductase hinge protein                         |
| ppi-5p-24      | DQ864839                    | Small nuclear ribonucleoprotein polypeptide G                          |
| ppi-5p-25      | DQ864840                    | Single-stranded DNA-binding replication protein A (RPA)                |
| ppi-5p-26      | DQ864841                    | Glyceraldehyde-3-phosphate dehydrogenase                               |
| ppi-5p-27-1    | DQ864842                    | Serine/Threonine protein kinases                                       |
| ppi-5p-27-2    | DQ864843                    | Serine/Threonine protein kinases                                       |
| ppi-5p-28      | DQ864844                    | Sugar phosphatases of the HAD superfamily                              |
| ppi-5p-29      | DQ864845                    | Some similarity to Archaeal atpase                                     |
| ppi-5p-30      | DQ864846                    | Some similarity to cpfnpa                                              |
| ppi-5p-31      | DQ864847                    | Some similarity to bacterial conserved hypothetical protein<br>lpg1269 |
| ppi-5p-32-1    | DQ864848                    | Glutaredoxin-like protein                                              |
| ppi-5p-32-2    | DQ864849                    | Glutaredoxin-like protein                                              |
| ppi-5p-32-3    | DQ864850                    | Glutaredoxin-like protein                                              |
| ppi-5p-33      | DQ864851                    | Acyltransferase family                                                 |
| ppi-5p-34-1    | DQ864852                    | Some similarity to Thioredoxins                                        |
| ppi-5p-34-2    | DQ864853                    | Some similarity to Thioredoxins                                        |
| ppi-5p-35      | DQ864854                    | ANK, ankyrin repeats                                                   |
| ppi-5p-36-1    | DQ864855                    | TB2/DP1, HVA22 family                                                  |
| ppi-5p-36-2    | DQ864856                    | TB2/DP1, HVA22 family                                                  |



| Gene Symbol | GenBank<br>Accession<br>No. | Encoded protein*                                                     |
|-------------|-----------------------------|----------------------------------------------------------------------|
| ppi-5p-36-3 | DQ864857                    | TB2/DP1, HVA22 family                                                |
| ppi-5p-36-4 | DQ864858                    | TB2/DP1, HVA22 family                                                |
| ppi-5p-37   | DQ864859                    | PCNA                                                                 |
| ppi-5p-38   | DQ864860                    | 14-3-3                                                               |
| ppi-5p-39   | DQ864861                    | Peptidase family M20/M25/M40                                         |
| ppi-5p-40   | DQ864862                    | Some similarity to FRQ1                                              |
| ppi-5p-41-1 | DQ864863                    | Translation elongation factor P (EF-P)                               |
| ppi-5p-41-2 | DQ864864                    | Translation elongation factor P (EF-P)                               |
| ppi-5p-42   | DQ864865                    | IF4E, Eukaryotic initiation factor 4E                                |
| ppi-5p-43   | DQ864866                    | RPT1, ATP-dependent 26S proteasome regulatory subunit                |
| ppi-5p-44-1 | DQ864867                    | Cyclophilin A, B and H-like                                          |
| ppi-5p-44-2 | DQ864868                    | Cyclophilin A, B and H-like                                          |
| ppi-5p-44-3 | DQ864869                    | Cyclophilin A, B and H-like                                          |
| ppi-5p-45   | DQ864870                    | Cyclophilin A, B and H-like                                          |
| ppi-5p-46   | DQ864871                    | BSD, domain in transcription factors and synapse-associated proteins |
| ppi-5p-47   | DQ864872                    | Serine/Threonine protein kinases                                     |
| ppi-5p-48   | DQ864873                    | Serine/Threonine protein kinases                                     |
| ppi-5p-49   | DQ864874                    | Conserved hypothetical protein 1                                     |
| ppi-5p-50   | DQ864875                    | Conserved hypothetical protein 2                                     |
| ppi-5p-51   | DQ864876                    | Conserved hypothetical protein 3                                     |
| ppi-5p-52-1 | DQ864877                    | Conserved hypothetical protein 4                                     |
| ppi-5p-52-2 | DQ864878                    | Conserved hypothetical protein 4                                     |
| ppi-5p-53   | DQ864879                    | Unknown protein 1                                                    |
| ppi-5p-54   | DQ864880                    | Unknown protein 2                                                    |
| ppi-5p-55   | DQ864881                    | Unknown protein 3                                                    |
| ppi-5p-56-1 | DQ864882                    | Unknown protein 4                                                    |
| ppi-5p-56-2 | DQ864883                    | Unknown protein 4                                                    |
| ppi-5p-56-3 | DQ864884                    | Unknown protein 4                                                    |
| ppi-5p-57   | DQ864885                    | Unknown protein 5                                                    |
| ppi-5p-58   | DQ864886                    | Unknown protein 6                                                    |
| ppi-5p-59   | DQ864887                    | Unknown protein 7                                                    |
| ppi-5p-60-1 | DQ864888                    | Unknown protein 8                                                    |
| ppi-5p-60-2 | DQ864889                    | Unknown protein 8                                                    |

| Gene Symbol  | GenBank<br>Accession<br>No. | Encoded protein*   |
|--------------|-----------------------------|--------------------|
| ppi-5p-60-3  | DQ864890                    | Unknown protein 8  |
| ppi-5p-60-4  | DQ864891                    | Unknown protein 8  |
| ppi-5p-60-5  | DQ864892                    | Unknown protein 8  |
| ppi-5p-60-6  | DQ864893                    | Unknown protein 8  |
| ppi-5p-60-7  | DQ864894                    | Unknown protein 8  |
| ppi-5p-60-8  | DQ864895                    | Unknown protein 8  |
| ppi-5p-60-9  | DQ864896                    | Unknown protein 8  |
| ppi-5p-60-10 | DQ864897                    | Unknown protein 8  |
| ppi-5p-60-11 | DQ864898                    | Unknown protein 8  |
| ppi-5p-60-12 | EF134391                    | Unknown protein 8  |
| ppi-5p-60-13 | EF134392                    | Unknown protein 8  |
| ppi-5p-60-14 | EF134393                    | Unknown protein 8  |
| ppi-5p-60-15 | EF134394                    | Unknown protein 8  |
| ppi-5p-60-16 | EF134395                    | Unknown protein 8  |
| ppi-5p-60-17 | EF134396                    | Unknown protein 8  |
| ppi-5p-60-18 | EF134397                    | Unknown protein 8  |
| ppi-5p-60-19 | EF134398                    | Unknown protein 8  |
| ppi-5p-60-20 | EF134399                    | Unknown protein 8  |
| ppi-5p-61    | DQ864899                    | Unknown protein 9  |
| ppi-5p-62    | DQ864900                    | Unknown protein 10 |
| ppi-5p-63    | DQ864901                    | Unknown protein 11 |
| ppi-5p-64    | DQ864902                    | Unknown protein 12 |
| ppi-5p-65    | DQ864903                    | Unknown protein 13 |
| ppi-5p-66    | DQ864904                    | Unknown protein 14 |
| ppi-5p-67    | DQ864905                    | Unknown protein 15 |
| ppi-5p-68    | DQ864906                    | Unknown protein 16 |
| ppi-5p-69    | DQ864907                    | Unknown protein 17 |
| ppi-5p-70    | DQ864908                    | Unknown protein 18 |
| ppi-5p-71    | DQ864909                    | Unknown protein 19 |
| ppi-5p-72    | DQ864910                    | Unknown protein 20 |
| ppi-5p-73    | DQ864911                    | Unknown protein 21 |
| ppi-5p-74-1  | DQ864912                    | Unknown protein 22 |
| ppi-5p-74-2  | DQ864913                    | Unknown protein 22 |
| ppi-5p-75    | DQ864914                    | Unknown protein 23 |

| Gene Symbol     | GenBank<br>Accession<br>No. | Encoded protein*                       |
|-----------------|-----------------------------|----------------------------------------|
| ppi-5p-76       | DQ864915                    | Unknown protein 24                     |
| ppi-5p-77       | DQ864916                    | Unknown protein 25                     |
| ppi-5p-78       | DQ864917                    | Unknown protein 26                     |
| ppi-5p-79-1     | DQ864918                    | Unknown protein 27                     |
| ppi-5p-79-2     | DQ864919                    | Unknown protein 27                     |
| ppi-5p-80       | DQ864920                    | Unknown protein 28                     |
| ppi-5p-81       | DQ864921                    | Unknown protein 29                     |
| ppi-5p-82       | DQ864922                    | Unknown protein 30                     |
| ppi-5p-83       | DQ864923                    | Unknown protein 31                     |
| ppi-5p-84-1     | DQ864924                    | Unknown protein 32                     |
| ppi-5p-84-2     | DQ864925                    | Unknown protein 32                     |
| ppi-5p-85       | DQ864926                    | Unknown protein 33                     |
| ppi-5p-86       | DQ864927                    | Unknown protein 34                     |
| ppi-5p-87       | DQ864928                    | Unknown protein 35                     |
| ppi-5p-88       | DQ864929                    | Unknown protein 36                     |
| ppi-5p-89       | DQ864930                    | Unknown protein 37                     |
| ppi-5p-90       | DQ864931                    | Unknown protein 38                     |
| ppi-5p-91       | DQ864932                    | Unknown protein 39                     |
| ppi-5p-92       | DQ864933                    | Unknown protein 40                     |
| ppi-5p-93       | DQ864934                    | Unknown protein 41                     |
| ppi-5p-94       | DQ864935                    | Unknown protein 42                     |
| ppi-5p-95       | DQ864936                    | Unknown protein 43                     |
| ppi-5p-96       | DQ864937                    | Acyl coa dehydrogenase protein 1       |
| ppi-5p-97       | DQ864938                    | Heat Shock protein 70                  |
| ppi-5p-98       | DQ864939                    | 40S ribosomal protein                  |
| ppi-5p-99       | DQ864940                    | 40S ribosomal protein S5               |
| ppi-5p-100      | DQ864941                    | Microsomal glutathione S-transferase 3 |
| ppi-5p-101-1    | DQ864942                    | PDZ domain                             |
| ppi-5p-101-2    | DQ864943                    | PDZ domain                             |
| ppi-5p-102      | DQ864944                    | Cytosolic large ribosomal subunit L11  |
| Ppi-5p-103-new1 | DQ864945                    | Unknown protein 44                     |
| Ppi-104-new2-1  | DQ864946                    | Unknown protein 45                     |
| Ppi-105-new2-2  | DQ864947                    | Unknown protein 45                     |
| Ppi-106-new3-1  | DQ864948                    | Unknown protein 46                     |

| Gene Symbol                                     | GenBank<br>Accession<br>No. | Encoded protein*                                         |
|-------------------------------------------------|-----------------------------|----------------------------------------------------------|
| Ppi-107-new3-2                                  | DQ864949                    | Unknown protein 46                                       |
| Ppi-108-new3-3                                  | DQ864950                    | Unknown protein 46                                       |
| Ppi-109-new4                                    | DQ864951                    | Unknown protein 47                                       |
| Ppi-110-new5-1                                  | DQ864952                    | Unknown protein 48                                       |
| Ppi-111-new5-2                                  | DQ864953                    | Unknown protein 48                                       |
| Ppi-112-new5-3                                  | DQ864954                    | Unknown protein 48                                       |
| Ppi-113-new6                                    | DQ864955                    | Unknown protein 49                                       |
| Ppi-114-new7                                    | DQ864956                    | Unknown protein 50                                       |
| Ppi-115-new8                                    | DQ864957                    | Unknown protein 51                                       |
| Ppi-116-new9                                    | DQ864958                    | Unknown protein 52                                       |
| Ppi-117-new10                                   | DQ864959                    | Unknown protein 53                                       |
| Ppi-118-new11                                   | DQ864960                    | Unknown protein 54                                       |
| Ppi-119-new12                                   | DQ864961                    | Unknown protein 55                                       |
| Ppi-120-new13                                   | DQ864962                    | Unknown protein 56                                       |
| Ppi-121-new14                                   | DQ864963                    | Unknown protein 57                                       |
| Ppi-122-new15                                   | DQ864964                    | Unknown protein 58                                       |
| Ppi-123-new16                                   | DQ864965                    | Unknown protein 59                                       |
| Ppi-124-new17                                   | DQ864966                    | Unknown protein 60                                       |
| Ppi-125-new18                                   | DQ864967                    | Unknown protein 61                                       |
| Ppi-126-new19                                   | DQ864968                    | Unknown protein 62                                       |
| Ppi-127-new20                                   | DQ864969                    | Unknown protein 63                                       |
| Ppi-128-new21                                   | DQ864970                    | Unknown protein 64                                       |
| Ppi-129-new22                                   | DQ864971                    | Conserved hypothetical protein 5                         |
| Ppi-130                                         | EF134400                    | Unknown protein 64                                       |
| Ppi-131-1                                       | EF134401                    | Unknown protein 65                                       |
| Ppi-131-2                                       | EF134402                    | Unknown protein 65                                       |
| <i>Prorocentrum minimum</i><br>(strain CCMP696) |                             |                                                          |
| pmi-5p-Pmi1                                     | DQ884413                    | Nitrite transporter                                      |
| pmi-5p-2                                        | DQ884414                    | Single domain cyclophilin type peptidyl-prolyl cis-trans |
| pmi-5p-3-1                                      | DQ884415                    | Centrin                                                  |
| pmi-5p-3-2                                      | DQ884416                    | Centrin                                                  |
| pmi-5p-3-3                                      | DQ884417                    | Centrin                                                  |
| pmi-5p-3-4                                      | DQ884418                    | Centrin                                                  |

| Gene Symbol | GenBank<br>Accession<br>No. | Encoded protein*                           |
|-------------|-----------------------------|--------------------------------------------|
| pmi-5p-4    | DQ884419                    | 40S ribosomal S14                          |
| pmi-5p-5    | DQ884420                    | Form II Rubisco                            |
| pmi-5p-5_2  | DQ884421                    | Heat shock protein 70                      |
| pmi-5p-6    | DQ884422                    | Uncharacterized protein family (UPF0160)   |
| pmi-5p-7-1  | DQ884423                    | Major basic nuclear protein                |
| pmi-5p-7-2  | DQ884424                    | Major basic nuclear protein                |
| pmi-5p-7-3  | DQ884425                    | Major basic nuclear protein                |
| pmi-5p-7-4  | DQ884426                    | Major basic nuclear protein                |
| pmi-5p-7-5  | DQ884427                    | Major basic nuclear protein                |
| pmi-5p-8-1  | DQ884428                    | Calmodulin                                 |
| pmi-5p-8-2  | DQ884429                    | Calmodulin                                 |
| pmi-5p-8-3  | DQ884430                    | Calmodulin                                 |
| pmi-5p-8-4  | DQ884431                    | Calmodulin                                 |
| Pmi-5p-9    | EF134371                    | Beta-tubulin                               |
| Pmi-5p-10   | EF134372                    | Lipopolysaccharide-induced TNF factor-like |
| Pmi-5p-11   | EF134373                    | Uridine kinase                             |
| Pmi-5p-12   | EF134374                    | Conserved hypothetical protein1            |
| Pmi-5p-13   | EF134375                    | Conserved hypothetical protein2            |
| Pmi-5p-14   | EF134376                    | Conserved hypothetical protein3            |
| Pmi-5p-15-1 | EF134377                    | Unknown protein 1                          |
| Pmi-5p-15-2 | EF134378                    | Unknown protein 1                          |
| Pmi-5p-16   | EF134379                    | Unknown protein 2                          |
| Pmi-5p-17   | EF134380                    | Unknown protein 3                          |
| Pmi-5p-18   | EF134381                    | Unknown protein 4                          |
| Pmi-5p-19-1 | EF134382                    | Unknown protein 5                          |
| Pmi-5p-19-2 | EF134383                    | Unknown protein 5                          |
| Pmi-5p-20-1 | EF134384                    | Unknown protein 6                          |
| Pmi-5p-20-2 | EF134385                    | Unknown protein 6                          |
| Pmi-5p-21   | EF134386                    | Unknown protein 7                          |
| Pmi-5p-22   | EF134387                    | Unknown protein 8                          |

\*, Number after an unknown or conserved hypothetical protein identifies a unique sequence within the species.
